# Supplementary material
Source: publisher site journal article supplement (http://www.spandidos-publications.com/6005/downloadSupplementary)
Supplement: Supplementary file 1 [file downloadSupplementary]

## Sheet: Sheet1
Supplementary Table IV. Pathway enrichment of DEGs by GO analysis. GO: Gene Ontology; DEGs: differentially expressed genes.
goID	goClass	goTerm	-log10(pValue)	pValue	FDR	backgroundGeneNo	inputGeneList
GO:0035577	cellular_component	azurophil granule membrane (8, 3.96)	2.79	0.00162092	0.043524	58	CD63,VNN1,C3AR1,STOM,ATP11B,AZU1,CEACAM8,CKAP4
GO:0031093	cellular_component	platelet alpha granule lumen (9, 3.86)	3	0.000999953	0.0279846	67	ORM1,HGF,VEGFB,FN1,QSOX1,TIMP1,ORM2,PF4,F5
GO:1904813	cellular_component	ficolin-1-rich granule lumen (13, 3.01)	3.13	0.000738681	0.0212719	124	GSN,TNFAIP6,PYGL,MAPK14,MMP9,HK3,LRG1,IMPDH2,ALOX5,TIMP2,ALDOC,CTSD,GYG1
GO:0042105	cellular_component	alpha-beta T cell receptor complex (4, 12.77)	3.15	0.000712514	0.0208201	9	CD3G,CD247,CD3E,CD3D
GO:0022625	cellular_component	cytosolic large ribosomal subunit (9, 4.46)	3.41	0.000392274	0.0123722	58	RPL4,RPL5,RPL31,RPL22,RPL14,RPL13,RPL38,RPL15,RPL18
GO:0045121	cellular_component	membrane raft (26, 2.20)	3.46	0.000346774	0.0111135	340	ITGAM,KCNA3,LTB4R,MS4A4A,DPP4,CD79A,LDHB,S1PR1,FLOT1,STOM,HMOX1,CTSD,CD177,CR1,CAVIN2,PLSCR1,LCK,P2RX1,KCNMA1,MAL,HPSE,MS4A1,LAT,SKAP1,BIRC3
GO:0001772	cellular_component	immunological synapse (8, 5.22)	3.49	0.000320644	0.0109848	44	LCK,CRTAM,HLA-DRA,RHOH,PRKCQ,CD3E,LAT,SKAP1
GO:0030139	cellular_component	endocytic vesicle (27, 2.30)	3.79	0.000163615	0.00580539	337	CAMK2D,CSF3R,NCF4,DYSF,HP,CD3G,PLD1,MPO,CD3D,DPP4,RAB20,PGLYRP1,LDLRAP1,ELANE,HLA-DPA1,SLAMF1,CD74,GSN,ANXA3,SLC11A1,RAB13,ZYX,HLA-DPB1,MAL,HLA-DRA,CLEC4E,IL7R
GO:0035578	cellular_component	azurophil granule lumen (12, 3.83)	3.79	0.000162555	0.00587267	90	CCT2,ARG1,PRKCD,PADI2,BPI,RNASE3,AZU1,RETN,RNASE2,MPO,ORM2,ELANE
GO:0005887	cellular_component	integral component of plasma membrane (91, 1.58)	4.54	2.86008e-05	0.00111431	1653	CD40,SIGLEC9,ITGAM,CSF3R,CD82,AQP9,NCF4,ICAM2,LRRC4,LRRC70,CD3G,CD3E,LTB4R,SIRPB1,FCAR,MILR1,FCRLA,ADGRE1,IL18RAP,SIT1,CLEC5A,C3AR1,FLOT1,ITGAX,FCER1A,SIRPA,CCR6,EMB,SLC16A3,HLA-DPA1,CD96,SLC38A1,IL4R,CR1,IL1R1,MMD,SLC11A1,FCRL3,PLSCR1,NCR3,CEACAM1,KCNMA1,TRAF5,CEACAM4,ITGA7,MAL,TNFRSF25,ITGA6,CD300C,TLR5,MS4A1,TRABD2A,SLC22A4,COL17A1,CD63,SAMD8,ADCY4,KCNA3,GPR84,CD1C,CD79B,ADGRG3,PGRMC1,BTLA,STO…
GO:0042613	cellular_component	MHC class II protein complex (7, 11.17)	4.87	1.3408e-05	0.000532834	18	CD74,HLA-DMB,HLA-DPB1,HLA-DRA,HLA-DOB,HLA-DPA1
GO:0009897	cellular_component	external side of plasma membrane (36, 2.34)	5.12	7.51966e-06	0.000324817	442	CD40,ITGAM,CSF3R,ECE1,CD3G,CD1C,CD3E,LY9,CD3D,CD79B,CD79A,ANPEP,CA4,S1PR1,FLOT1,ITGAX,CCR7,CCR6,SLAMF1,CCR1,CD74,SLC38A1,IL1R1,BTN3A2,CD40LG,CD5,P2RX1,IL2RB,ADAM9,MAL,CD27,FOLR3,IL7R,CLEC2D,MS4A1
GO:0101003	cellular_component	ficolin-1-rich granule membrane (12, 5.65)	5.27	5.37482e-06	0.000248367	61	SERPINB10,MGAM,CLEC4D,CR1,DOK3,SLC11A1,ITGAX,SIRPA,NBEAL2,DSC1,FCAR,SIGLEC5
GO:1904724	cellular_component	tertiary granule lumen (16, 8.36)	8.89	1.30232e-09	1.07821e-07	55	ORM1,TNFAIP6,HP,MMP8,MMP9,OSCAR,CHIT1,LRG1,TCN1,TIMP2,QSOX1,PTX3,ALDOC,FOLR3,PGLYRP1,CTSD
GO:0070062	cellular_component	extracellular exosome (128, 1.75)	8.94	1.157e-09	9.99543e-08	2098	RPL4,RPL5,IL1RN,CD82,RPL31,HP,PEBP1,MPO,FBL,SNRPD2,SIT1,ANPEP,C1RL,SIRPA,PGLYRP1,PRKACB,CD177,CDK5RAP2,SLC38A1,PRKCH,HGD,RPS5,SERPINF1,RPL22,PRKCD,RNASE2,PGD,UPB1,OSCAR,SLPI,PPA1,CMPK1,PADI2,ADAM9,DSC1,DSC2,SUCNR1,TACSTD2,LIN7A,LTBP3,AEBP1,FBLN5,ADH5,CD79B,PGS1,DPP4,LDHB,FIGNL1,TSPAN3,ELANE,SLAMF1,NIBAN1,KL,MGAM,EPHX2,FN1,AZU1,BST1,LCN2,ALPL,HLA-DRA,CYSTM1,TGFBI,ITM2C,ORM1,CD40,ITGAM,DYSF,ECE1,PY…
GO:0070821	cellular_component	tertiary granule membrane (19, 7.48)	9.73	1.85311e-10	2.30134e-08	73	ATP8B4,MGAM,ITGAM,SLC11A1,NBEAL2,MCEMP1,GPR84,PLD1,FCAR,CEACAM1,CLEC4D,CLEC5A,ITGAX,STOM,SIRPA,CYSTM1,CEACAM8,CD177,SIGLEC5
GO:0035579	cellular_component	specific granule membrane (21, 6.63)	9.85	1.39803e-10	1.85193e-08	91	ATP8B4,MS4A3,ITGAM,MCEMP1,GPR84,PLD1,FCAR,CKAP4,CEACAM3,ADGRG3,BST1,PGRMC1,MMP25,CEACAM1,CLEC4D,P2RX1,CLEC5A,C3AR1,STOM,CEACAM8,CD177
GO:0035580	cellular_component	specific granule lumen (21, 9.73)	12.52	3.00328e-13	7.4594e-11	62	ORM1,ARG1,HP,RETN,MMP8,ORM2,OSCAR,CHIT1,LRG1,SLPI,TCN1,TIMP2,LCN2,BPI,QSOX1,PTX3,FOLR3,HPSE,PGLYRP1,CTSD,ELANE
GO:0003953	molecular_function	NAD+ nucleosidase activity (7, 7.18)	3.85	0.000139956	0.0455322	28	BST1,IL18RAP,BANK1,IL1R1,MAL,TLR5,IL18R1
GO:0023026	molecular_function	MHC class II protein complex binding (7, 7.45)	3.94	0.000115284	0.0401845	27	CD74,HLA-DMB,HLA-DPB1,HLA-DRA,MS4A1,HLA-DOB,HLA-DPA1
GO:0004896	molecular_function	cytokine receptor activity (14, 4.15)	4.67	2.16212e-05	0.0131889	97	CCR1,CD74,IL4R,CSF3R,IL1R1,IL1R2,IFNLR1,IL18RAP,IL2RB,CCR7,CCR6,IL7R,IL18R1
GO:0042802	molecular_function	identical protein binding (113, 1.54)	5.17	6.71501e-06	0.00468132	2105	PRAG1,ETS1,AQP3,GIMAP7,TCL1A,GRB10,CAPN3,ROPN1L,HADH,GYG1,TPD52,SH3GLB1,ST6GAL1,DGAT2,HGD,SLC11A1,HGF,RPL22,MCEMP1,SLC51A,UPB1,CCNB1IP1,TLE5,TPST1,BIN1,PADI2,MAL,PADI4,BEX3,NECAB1,MAGED1,UAP1,GATA3,RASGRP1,FHIT,FBLN5,ADH5,CD79B,DPP4,CD79A,LDHB,HMOX1,MAP2K6,SLAMF1,GADD45A,EPHX2,CRTAM,EIF2AK3,FN1,WDR54,EXT1,TP53I3,BCL6,LCN2,TGFBI,ECE1,CD3G,PYGL,OPLAH,CD3E,CD3D,DNPH1,JCHAIN,ATIC,CASP6,UPP1,CR2,VPS9D…
GO:0002719	biological_process	negative regulation of cytokine production involved in immune response (6, 6.38)	3.14	0.000723344	0.0451143	27	CD96,BCL6,ARG1,HMOX1,IRAK3,SLAMF1
GO:0042254	biological_process	ribosome biogenesis (23, 2.25)	3.16	0.000695287	0.0437113	293	RPL5,WDR36,NPM1,NOP58,DDX47,DIMT1,RPS5,RPS6,MAK16,RSL1D1,FBL,RPS17,EXOSC4,ZNHIT3,C1QBP,RPL14,RPL38,BRIX1,NOL11,BUD23,RRP12,RBIS,NOP53
GO:0043408	biological_process	regulation of MAPK cascade (41, 1.79)	3.24	0.000573936	0.0366689	658	CD40,MAGED1,GBA,PEBP1,RASGRP1,FOXO1,DUSP13,LILRA5,LBH,MYC,TIMP2,S100A12,SIRPA,CCR7,ELANE,MAP2K6,SLAMF1,CCR1,CD74,KL,NQO2,GADD45A,FCRL3,HGF,PRKCD,VEGFB,FN1,IRAK3,MMP8,WDR54,GADD45G,NLRP12,CEACAM1,BANK1,GPR183,TRAF5,PDCD4,ADAM9,MAL,CD27,PPARG
GO:0002503	biological_process	peptide antigen assembly with MHC class II protein complex (5, 8.98)	3.26	0.000552208	0.0355699	16	HLA-DMB,HLA-DPB1,HLA-DRA,HLA-DOB,HLA-DPA1
GO:0030183	biological_process	B cell differentiation (13, 3.14)	3.29	0.000518659	0.0338247	119	TPD52,CR2,CD79B,ADGRG3,CD79A,CD40LG,BCL6,POU2AF1,GPR183,BLNK,IRF8,ITM2A,MS4A1
GO:0043300	biological_process	regulation of leukocyte degranulation (8, 4.89)	3.32	0.000474845	0.0313577	47	BLK,CEACAM1,IL4R,ITGAM,FES,HMOX1,PRAM1,CD177
GO:0031325	biological_process	positive regulation of cellular metabolic process (147, 1.33)	3.35	0.000444004	0.0299503	3186	RPL5,PID1,YEATS4,RORA,ETS1,TCL1A,FAM162A,SESN1,MYC,GRB10,CAPN3,TRIM25,SOX8,HMGN3,CD177,CDK5RAP2,SH3GLB1,DGAT2,ACSL1,DIMT1,SLC11A1,NSMCE3,HGF,PRKCD,PASK,ZNF91,POR,ZNF438,PADI2,ADAM9,MAL,HOXB2,PRKCQ,TRIB2,SKAP1,ASF1A,TRABD2A,PFKFB2,BEX3,ZNF395,MAGED1,TXK,GATA3,PLD1,RASGRP1,FOXO1,NPAT,BAG3,STAP1,HMOX1,S100A12,ELANE,MAP2K6,NIBAN1,OPN3,BCL11B,GADD45A,EIF2AK3,FN1,PARP16,NR1D2,IFNLR1,AZU1,NSG1,BCL6,CDK4…
GO:0002886	biological_process	regulation of myeloid leukocyte mediated immunity (9, 4.54)	3.46	0.000349857	0.0247689	57	BLK,IL4R,ITGAM,FES,ARG1,STAP1,HMOX1,PRAM1,CD177
GO:0043030	biological_process	regulation of macrophage activation (9, 4.54)	3.46	0.000349857	0.024881	57	CD74,IL4R,STAP1,BPI,RORA,VSIG4,MMP8,CST7,CD200
GO:0006915	biological_process	apoptotic process (55, 1.75)	3.82	0.000149701	0.0125821	905	ITGAM,DYRK2,DDX47,CD3E,CASP5,FAM162A,CASP6,MYC,C1QBP,CAPN3,KIF1B,TMEM14A,SH3GLB1,RPS6,PRKCD,KREMEN1,PLSCR1,AIM2,TRAF5,MZB1,MAL,TNFRSF25,ITGB3BP,BIRC3,BEX3,MAGEH1,BEX2,USP53,GBA,LEF1,NLRC4,FHIT,FOXO1,DRAM1,BAG3,THEM4,HMOX1,NAE1,MAP2K6,BCL2L15,GSN,SORT1,GADD45A,CARD6,G0S2,NSG1,BMX,MAPK14,GADD45G,CD5,P2RX1,GJB6,LCN2,PDCD4,CD27
GO:0032496	biological_process	response to lipopolysaccharide (28, 2.51)	4.57	2.67203e-05	0.00313405	320	CD40,HPGD,CEBPE,ADM,MPO,FCAR,ADH5,STAP1,SIRPA,CCR7,ELANE,CD96,ARG1,SLC11A1,IRAK3,MAPK14,SLPI,CDK4,GJB6,LCN2,PDCD4,ADAM9,ALPL,MAL,IRF8,BPI,TLR5,PF4
GO:0050728	biological_process	negative regulation of inflammatory response (17, 3.46)	4.61	2.47854e-05	0.00295116	141	TNFAIP6,SERPINF1,HGF,GBA,PRKCD,NR1D2,RORA,GATA3,MAPK14,CST7,NLRP12,ALOX5,SIRPA,PPARG,PGLYRP1,CD200,ELANE
GO:0045582	biological_process	positive regulation of T cell differentiation (14, 4.42)	4.94	1.13593e-05	0.00160842	91	CD74,IL4R,CR1,LEF1,RHOH,GATA3,RASGRP1,VNN1,TESPA1,BCL6,HLX,HLA-DRA,CD27,IL7R
GO:0032715	biological_process	negative regulation of interleukin-6 production (10, 6.53)	4.96	1.09394e-05	0.00157739	44	NLRP12,ORM1,BANK1,HGF,GBA,SIRPA,BPI,IRAK3,CD200,SLAMF1
GO:0042832	biological_process	defense response to protozoan (8, 9.57)	5.09	8.1088e-06	0.00121377	24	CCDC88B,CD40,IL4R,ARG1,SLC11A1,IRF8,PF4,BATF
